# Supplementary material for: Crosstalk of Transcriptional Regulators of Adaptive Immune System and microRNAs: An Insight into Differentiation and Development
Source: Cells. 2023 Feb 16;12(4):635. doi: 10.3390/cells12040635 (PMC9953855; doi:10.3390/cells12040635)
Supplement: Supplementary file 1 [file cells-12-00635-s001.zip › cells-2129819-supplementary.pdf]

**Table S1.** The crosstalk of miRNA and TFs.

|               | miRNA                          | Transcription factor     | Function                                                                          | Reference       |
|---------------|--------------------------------|--------------------------|-----------------------------------------------------------------------------------|-----------------|
| <b>T-cell</b> |                                |                          |                                                                                   |                 |
| CLP           | miR-181a1/b1                   | Notch-1                  | Thymocyte development                                                             | [17]            |
| CLP           | miR-150                        | Notch-3                  | Decreasing survival and proliferation of T-cells                                  | [31,32]         |
| CLP           | miR-146a                       | PU.1, GATA3, Runx1       | Promoting T-cell proliferation and reducing the number of peripheral CD4+ T-cells | [34,35]<br>[36] |
| CLP           | miR-155                        | 1.SOCS1,                 | 1. Promoting thymocytes proliferation                                             | [44,45]         |
| Th2           |                                | 2.c-Maf                  | 2. Promoting Th2 cell differentiation                                             | [72,73]         |
| Treg          |                                | 3. Foxp3                 | 3. Derivation process of Treg from naïve T-cells                                  | [88,89]         |
| Treg          |                                | 4. STAT5                 | 4. Modulating thymic generation of Treg cells                                     | [92]            |
| Treg          | miR-115, miR-124a              | Foxp3                    | Generating iTreg                                                                  | [89]            |
| CD4+Th        | miR-181a-5p                    | Cd4 silencer             | Governing CD4+ helper cell subset differentiation                                 | [52,53].        |
| Th1           | miR-29                         | Tbx21                    | Decreasing Th1 cell differentiation                                               | [60]            |
| Th2           | miR-126                        | OBF.1/BOB.1, PU.1, GATA3 | Th2 cell differentiation and activation                                           | [50]            |
| Th17          | miR-301a                       | PIAS3                    | Th17 cell differentiation                                                         | [20,50]         |
| Th17          | miR-182                        | STAT5, Foxo1             | Th17 differentiation                                                              | [43]            |
| Treg          | miR-21                         | STAT3, Ap-1              | Inducing homeostasis of Tregs                                                     | [82,93]         |
| Tfh           | miR-17-92                      | BCL-6                    | Positive or a negative regulator of Tfh                                           | [99]            |
| <b>B-cell</b> |                                |                          |                                                                                   |                 |
|               | miR-150                        | Myb, Foxp1               | Governing the B-cell development                                                  | [32,130]        |
|               | miR-23a                        | PU.1                     | Increasing number of B lymphocytes                                                | [127]           |
|               | miR-24-2 alone or with miR-23a | PU.1                     | Inducing the differentiation of HSCs into common myeloid progenitors              | [109,129]       |
|               | miR-212/132                    | Sox4                     | B-cell lymphopoiesis                                                              | [130]           |
|               | miR-34a                        | Foxp1                    | Pro-to-pre-B cell transition                                                      | [125]           |
|               | miR-125b                       | IRF4, BLIMP-1            | Plasma cell generation and memory B-cell transition                               | [140]           |
